# Supplementary material for: Calcium bioaccessibility and uptake by human intestinal like cells following in vitro digestion of casein phosphopeptide–calcium aggregates
Source: Royal Society of Chemistry journal article supplement (doi:10.1039/c4fo00672k), 2015-01-01
Supplement: c4fo00672k1.pdf [file c4fo00672k1.pdf]

### ESI figure caption

**Figure S1.** Effect of CPPs in Caco2 cells. The average change in cytosolic calcium,  $[Ca^{2+}]_i$ , after administration (1280  $\mu$ M) of Ca-CPPs (A), digested Ca-CPPs (B), Ca-dekCPPs (C) and digested Ca-dekCPPs (D) together with relative SD were shown. Each graph represents the average behaviour of 10-12 independent experiments, each of them consisting of a minimum of 40-60 analysed cells.

**Figure S2.** Effect of CPPs in HT-29 cells. The average change in cytosolic calcium,  $[Ca^{2+}]_i$ , after administration (1280  $\mu$ M) of Ca-CPPs (A), digested Ca-CPPs (B), Ca-dekCPP CPPs (C) and digested Ca-dekCPPs (D) together with relative SD were shown. Each graph represents the average behaviour of 10-12 independent each of them consisting of a minimum of 70-90 analysed cells.
