# Supplementary figures and images for: Calcium bioaccessibility and uptake by human intestinal like cells following in vitro digestion of casein phosphopeptide–calcium aggregates
Source: Royal Society of Chemistry journal article supplement (doi:10.1039/c4fo00672k), 2015-01-01

**A**

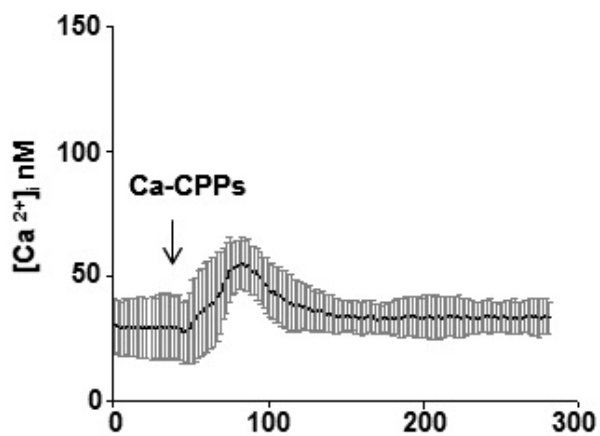

**B**

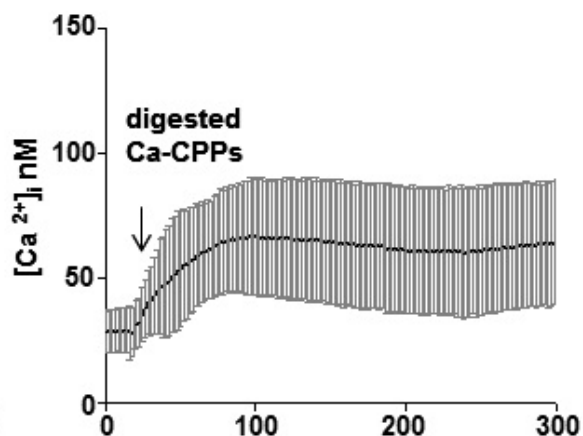

**C**

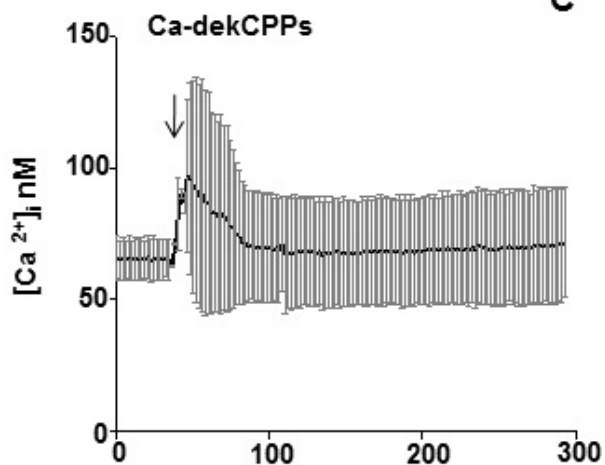

**D**

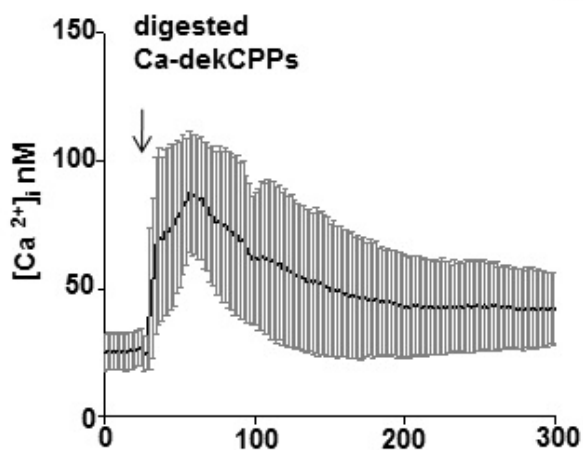

Supplement: c4fo00672k2.pdf [file c4fo00672k2.pdf]
